# Supplementary material
Source: Royal Society of Chemistry journal article supplement (doi:10.1039/d5ta09497f)
Supplement: d5ta09497f1.pdf [file d5ta09497f1.pdf]

1 **Supporting Information**

2 **Precursor degree of polymerization engineering to**  
3 **understand the sodium storage behavior of closed pores in**  
4 **hard carbon**

5 **Haojie Du**<sup>a, b</sup>, **Lu Zhou**<sup>a, b</sup>, **Rucan Chen**<sup>a, b</sup>, **Lei Zhang**<sup>a, b,\*</sup>, **Xueyi**  
6 **Guo**<sup>a, b</sup>, **Qinghua Tian**<sup>a, b</sup>, **Qinmeng Wang**<sup>a, b,\*\*</sup>, **Hui Tong**<sup>a, b</sup>, and  
7 **Shuo Wang**<sup>c</sup>

8 <sup>a</sup> School of Metallurgy and Environment, Central South University, Changsha  
9 410083, China.

10 <sup>b</sup> Cleaner Metallurgical Engineering Research Center, China Nonferrous Metals  
11 Industry Association, Changsha 410083, China.

12 <sup>c</sup> BTR New Material Group Co. , Ltd. Shenzhen 518107, China.

13 \* *Correspondence to: Lei Zhang, No. 932 Lushan southe road, Changsha, Hunan province,*  
14 *410083, People's Republic of China, E-mail: zhang\_lei@csu.edu.cn, telephone:*  
15 *+8615111172871.*

16 \*\* *Correspondence to: Qinmeng Wang, No. 932 Lushan southe road, Changsha, Hunan*  
17 *province, 410083, People's Republic of China, E-mail: qm\_wang@163.com, telephone:*  
18 *+8613574812541.*

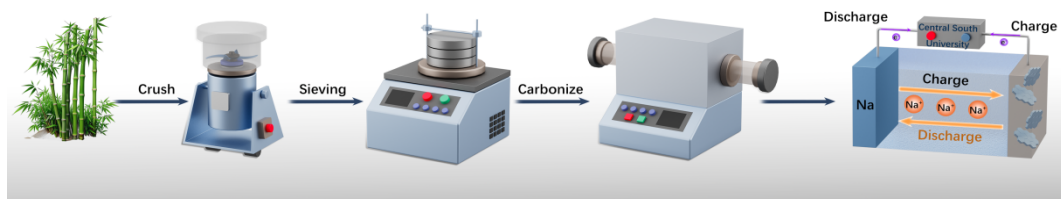

**Fig. S1** Schematic illustration of the synthesis procedure

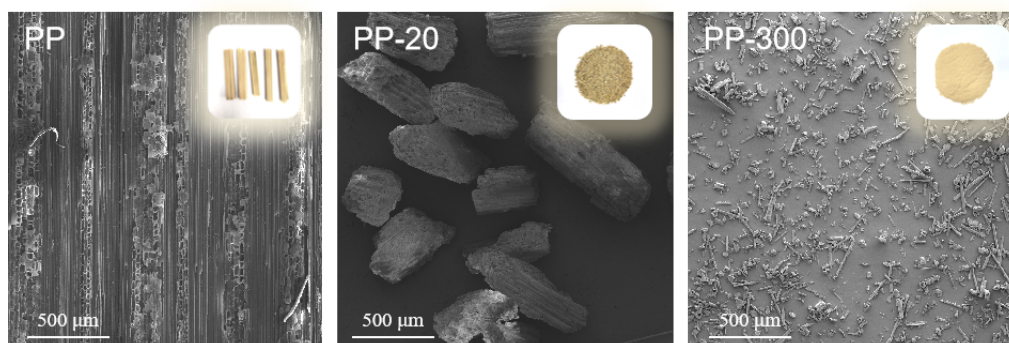

**Fig. S2** SEM images of PP, PP-20, and PP-300

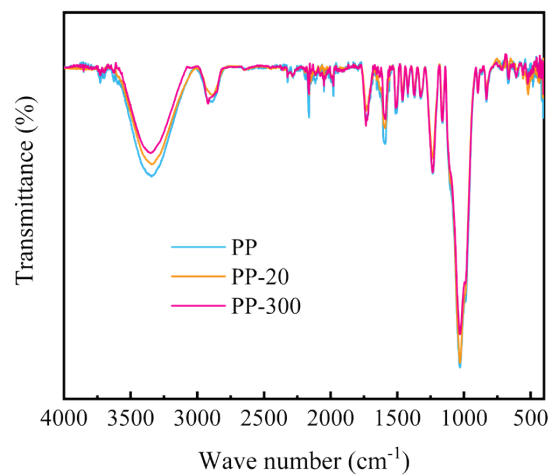

**Figure S3.** Baseline-corrected FTIR curves of PP, PP-20, and PP-300.

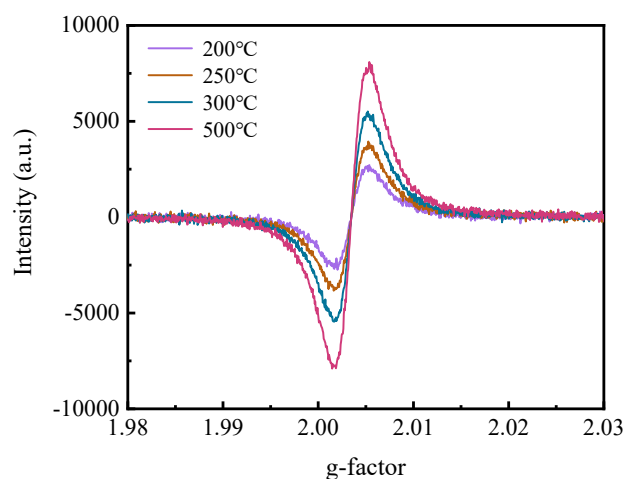

**Figure S4.** g-factor of PP at different temperatures

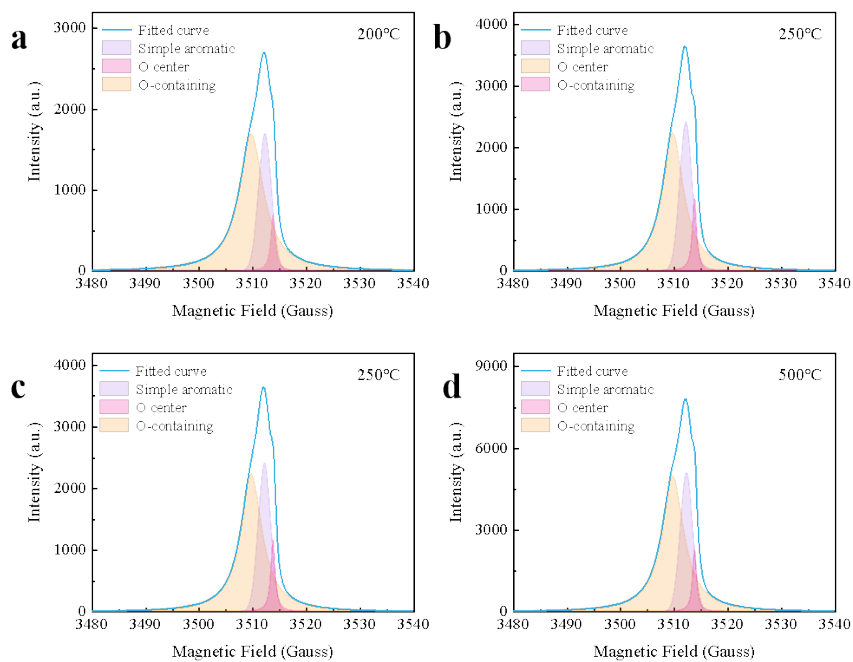

**Figure S5.** EPR Fitted curves of PP at different temperatures

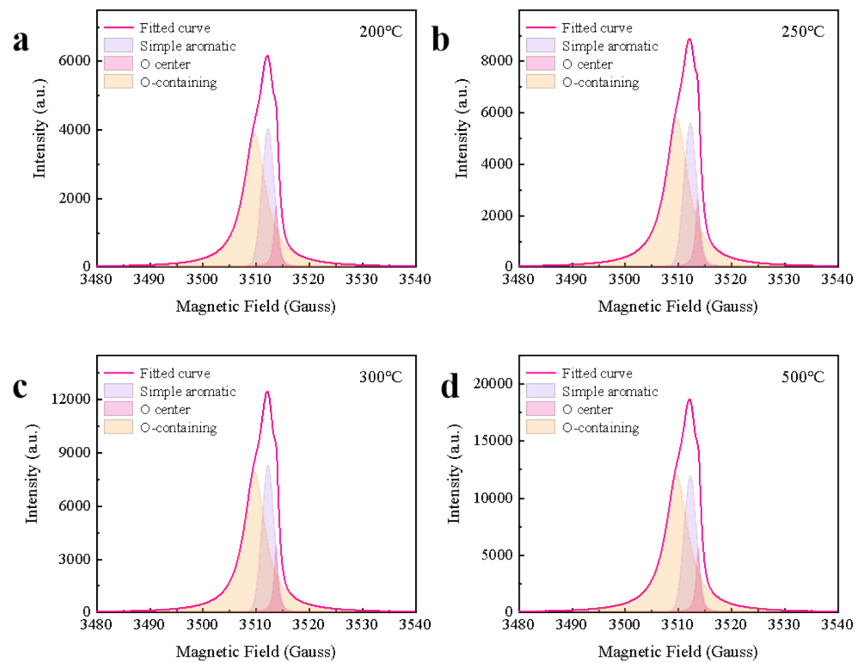

**Figure S6.** EPR fitted curves of PP-300 at different temperatures

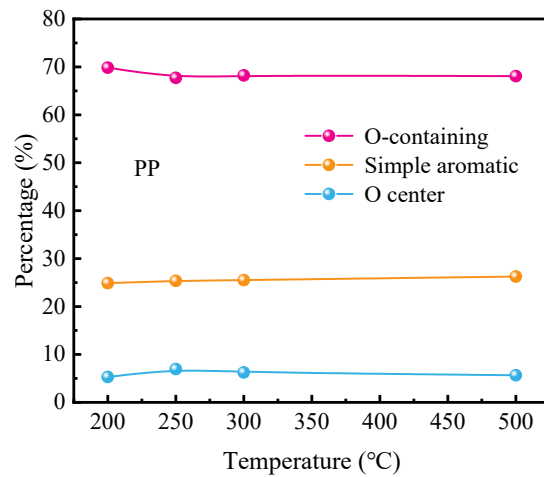

**Figure S7.** Percentage of free radicals of PP at different temperatures

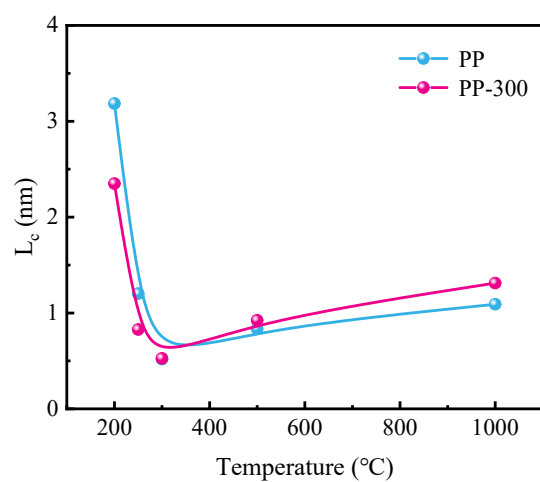

**Figure S8.** Lc of PP and PP-300 at different temperatures

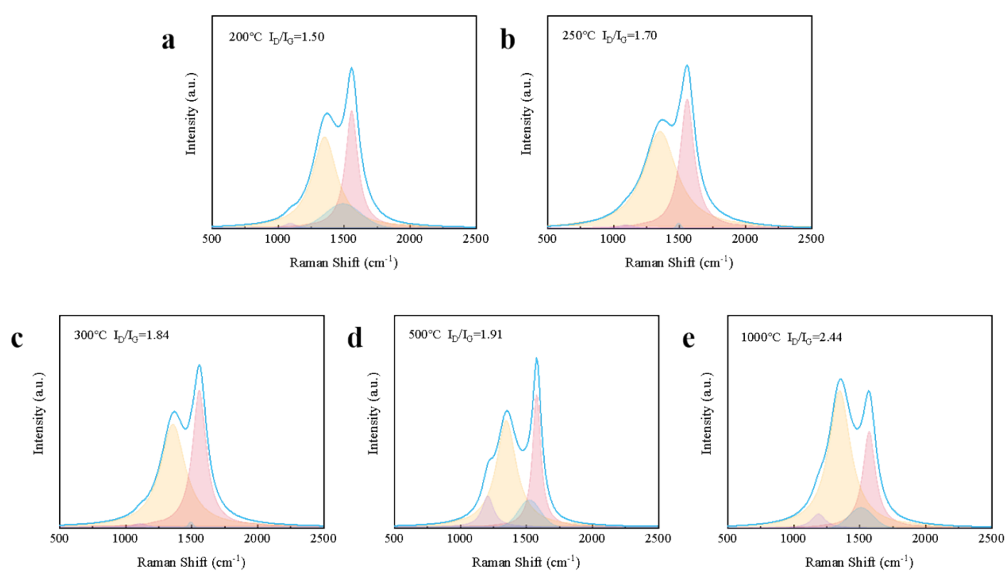

**Figure S9.** Raman fitted curves of PP at different temperatures

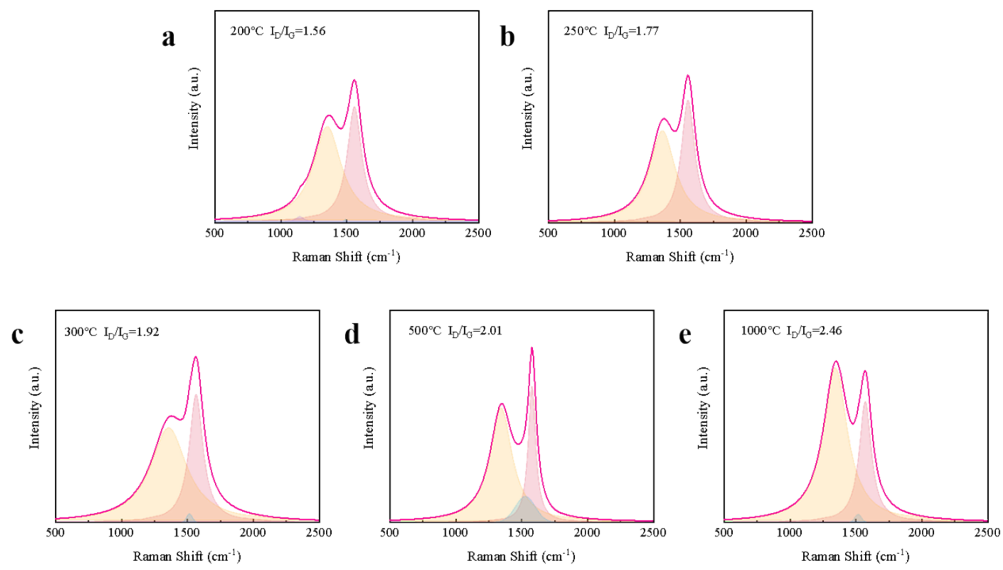

**Figure S10.** Raman fitted curves of PP-300 at different temperatures

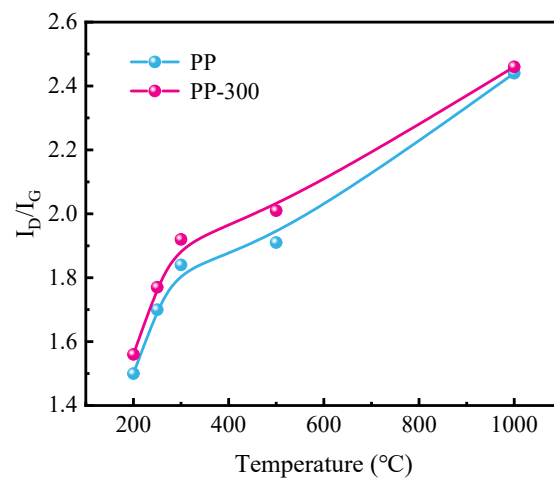

**Figure S11.**  $I_D/I_G$  of PP and PP-300 at different temperatures

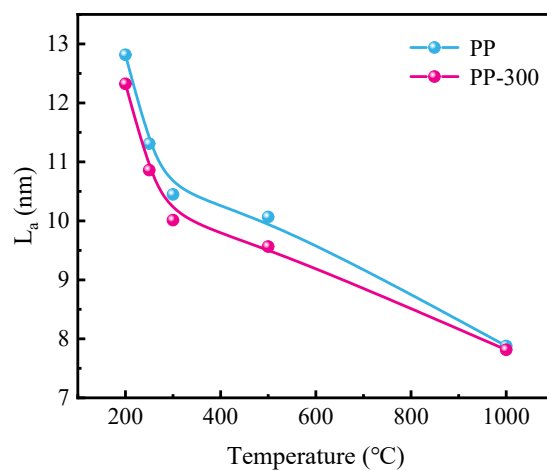

**Figure S12.**  $L_a$  of PP and PP-300 at different temperatures

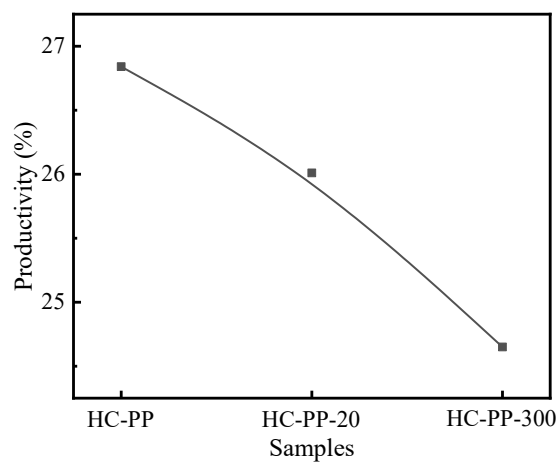

**Figure S13.** Carbonization yield of PP, PP-20, and PP-300

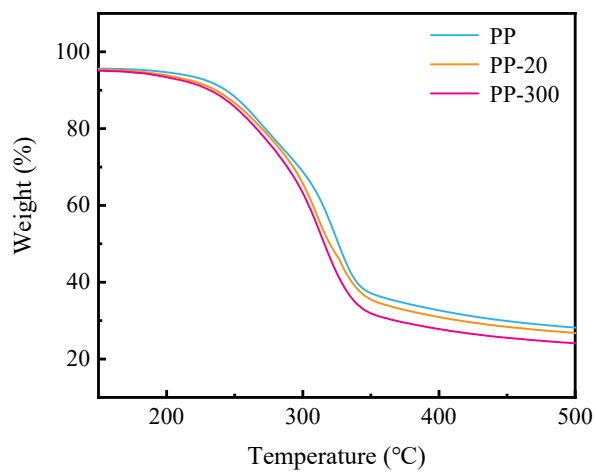

**Figure S14.** Thermogravimetric analysis curves of PPs

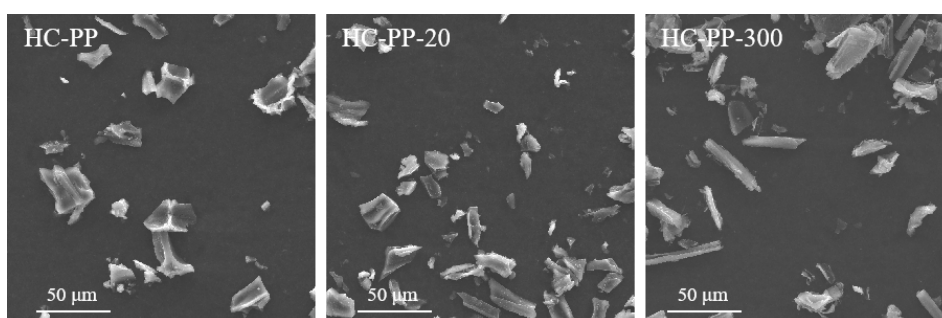

**Figure S15.** SEM images of of HC-PP, HC-PP-20, and HC-PP-300

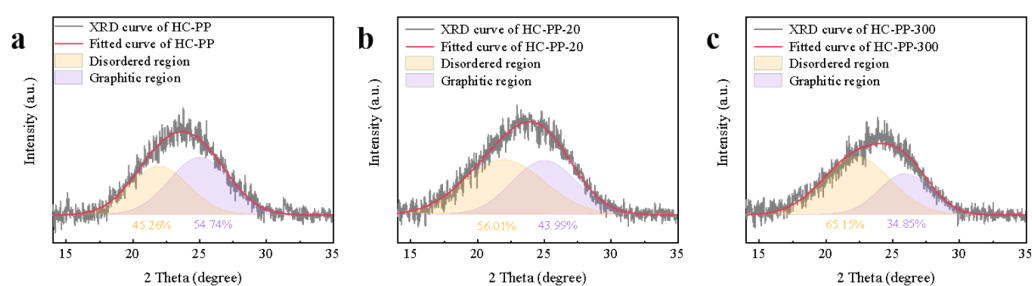

**Figure S16.** XRD fitted curves of HC-PP, HC-PP-20, and HC-PP-300

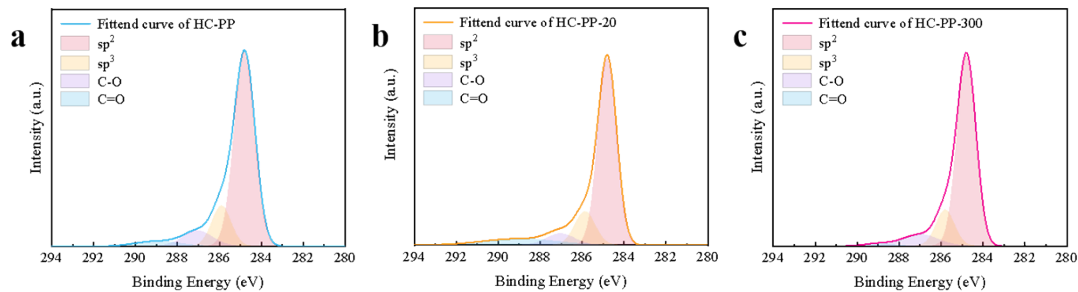

**Figure S17.** XPS C1s spectra and fitted curves of HC-PP, HC-PP-20, and HC-PP-300

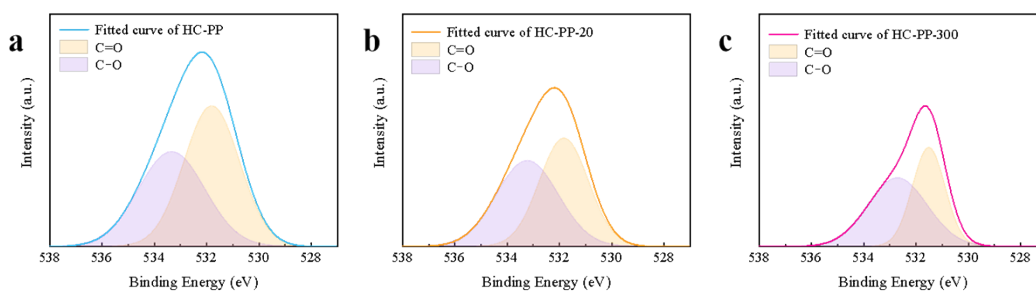

**Figure S18.** XPS O1s spectra and fitted curves of HC-PP, HC-PP-20, and HC-PP-300

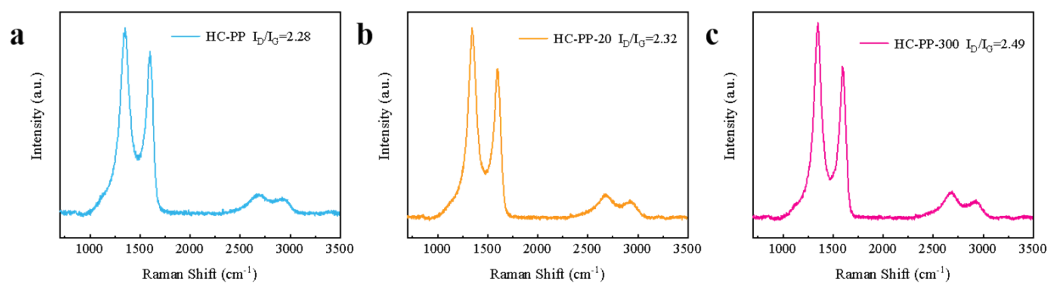

**Figure S19.** Raman curves of HC-PP, HC-PP-20, and HC-PP-300

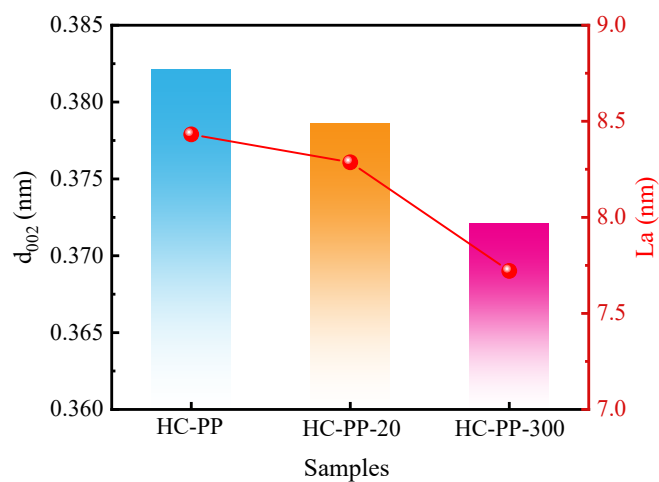

**Figure S20.**  $d_{002}$  and  $L_a$  of HC-PP, HC-PP-20, and HC-PP-300

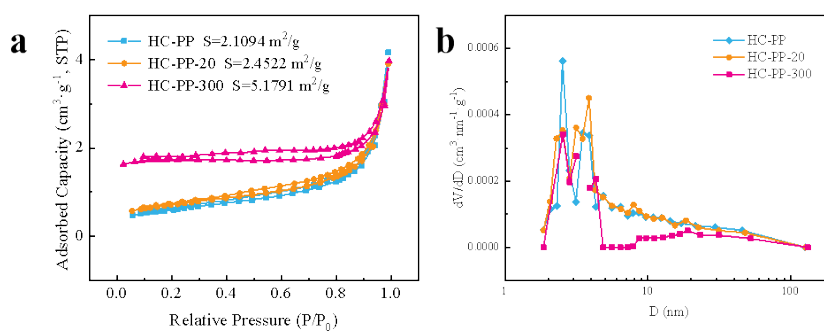

**Figure S21.** Nitrogen adsorption and desorption isothermal curves and pore size distribution of HC-PP, HC-PP-20, and HC-PP-300

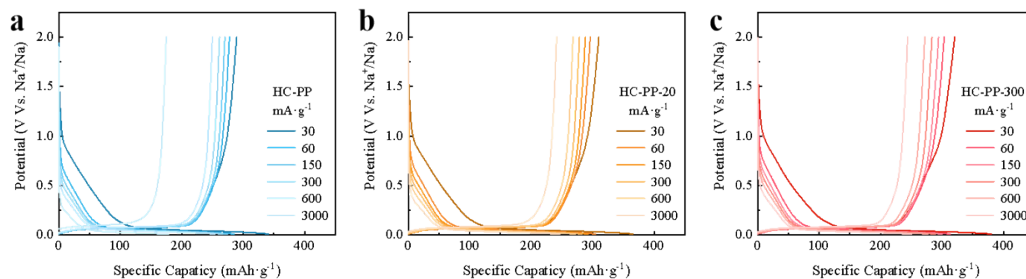

**Figure S22.** The GCD curves at different current densities of HC-PP, HC-PP-20, and HC-PP-300

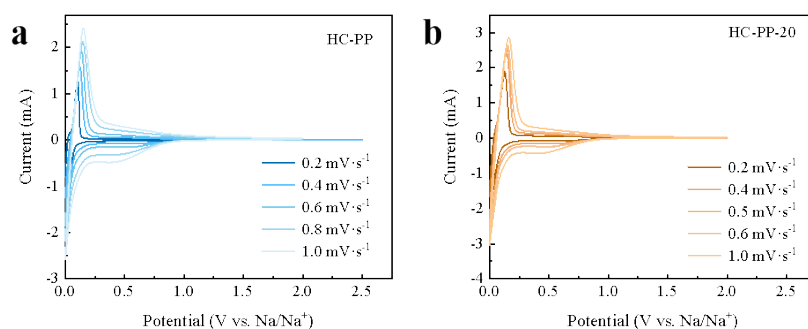

**Figure S23.** CV curves of HC-PP(a), HC-PP-20(b) at various scan rates of 0.2, 0.4, 0.6, 0.8, 1.0  $\text{mV s}^{-1}$ .

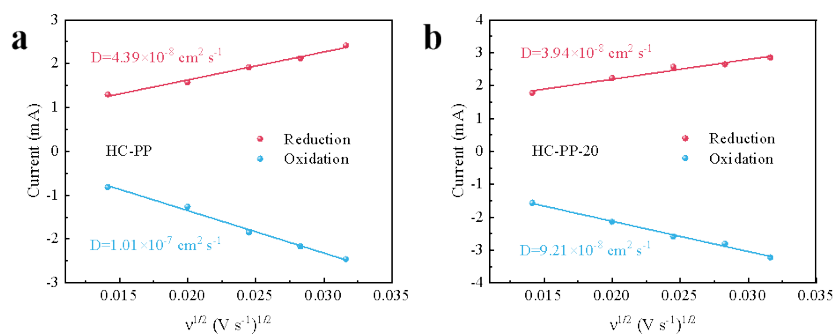

**Figure S24.**  $\text{Na}^+$  diffusion coefficient of HC-PP(a), HC-PP-20(b) at various scan rates of 0.2, 0.4, 0.6, 0.8, 1.0  $\text{mV s}^{-1}$ .

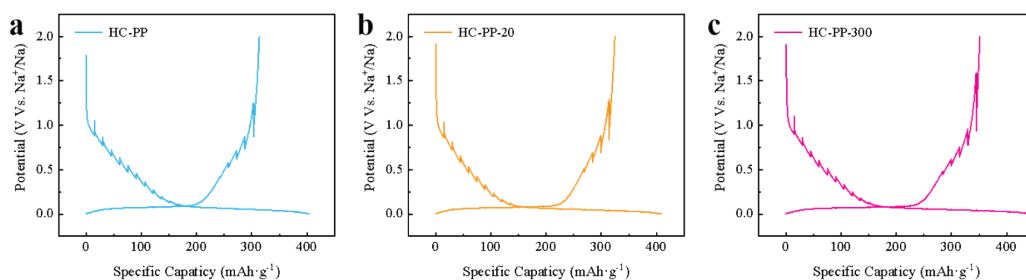

**Figure S25.** GITT curves of HC-PP, HC-PP-20, and HC-PP-300

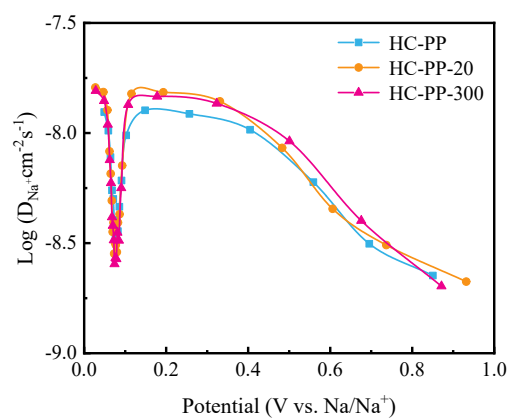

**Figure S26.**  $\text{Na}^+$  diffusion coefficient of HC-PP, HC-PP-20, HC-PP-300 calculated from GITT during charge process

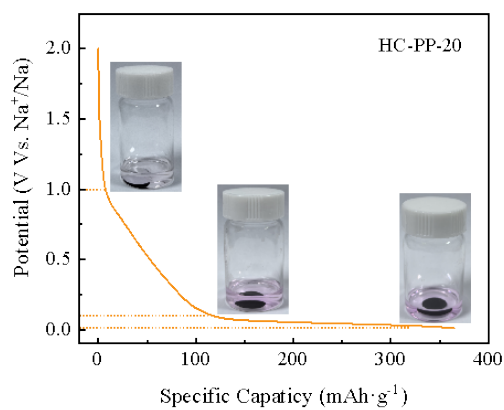

**Figure S27.** The color change of ethanol solution containing 1% phenolphthalein after reaction with HC-PP-20 electrode.

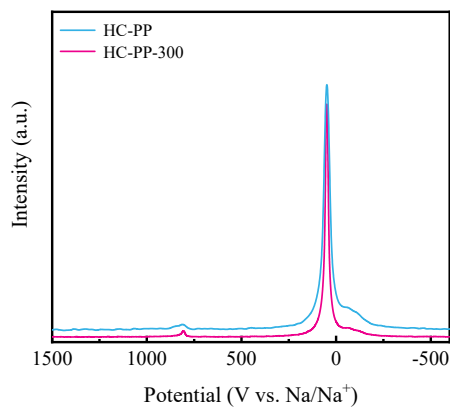

**Figure S28.** Sodium NMR patterns of HC-PP, and HC-PP-300 after discharging to 0.01V

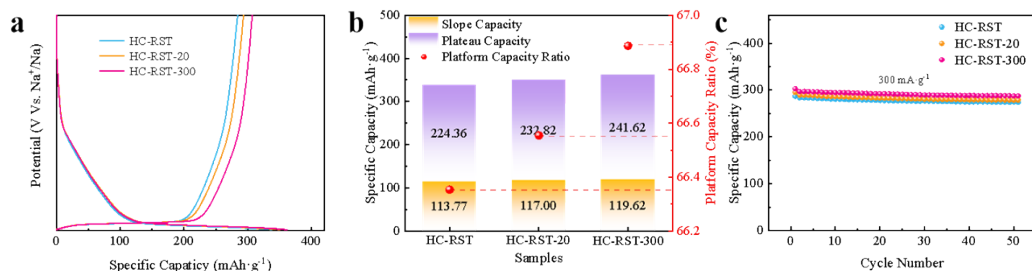

**Figure S29.** a) The GCD curves of HC-RST, HC-RST-20, and HC-RST-300 at 30 mA g<sup>-1</sup>. b) The capacity ratios of slope capacity (>0.1 V) and plateau capacity (<0.1 V) of HC-RST, HC-RST-20, and HC-RST-300. c) The cycling performance of HC-RST, HC-RST-20, and HC-RST-300 at 300 mA g<sup>-1</sup>.

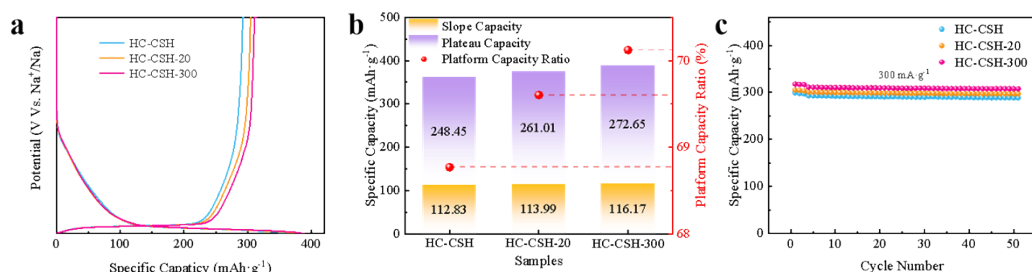

**Figure S30.** a) The GCD curves of HC-CSH, HC-CSH-20, and HC-CSH-300 at 30 mA g<sup>-1</sup>. b) The capacity ratios of slope capacity (>0.1 V) and plateau capacity (<0.1 V) of HC-CSH, HC-CSH-20, and HC-CSH-300. c) The cycling performance of HC-CSH, HC-CSH-20, and HC-CSH-300 at 300 mA g<sup>-1</sup>.

**Table S1.** The composition of phyllostachys pubescens

| Composition | Cellulose | Lignin | Hemicellulose | Others |
|-------------|-----------|--------|---------------|--------|
| Content     | 36.1%     | 28.1%  | 15.1%         | 20.7%  |

**Table S2.** Structure parameters of PP, PP-20, PP-300.

| Samples | $L_c$ | $CrI$ | $Mw$          | $Mp$          | Carbon yield at 1500°C |
|---------|-------|-------|---------------|---------------|------------------------|
| Units   | nm    | %     | $g\ mol^{-1}$ | $g\ mol^{-1}$ | %                      |
| PP      | 2.88  | 61.69 | 172575        | 324126        | 26.84                  |
| PP-20   | 2.84  | 49.72 | 151463        | 273057        | 26.01                  |
| PP-300  | 2.72  | 47.80 | 121139        | 147887        | 24.65                  |

**Table S3.** Structure parameters of HC-PP, HC-PP-20, HC-PP-300.

| Samples   | $d_{002}$ | $L_c$ | $I_D/I_G$ | $L_a$<br>Raman | $S_{BET}(N_2)$ | $D_{BET}$ | $V_{BET}$      | True density | $V_{Closed}$   |
|-----------|-----------|-------|-----------|----------------|----------------|-----------|----------------|--------------|----------------|
| Units     | nm        | nm    | -         | nm             | $m^2\ g^{-1}$  | nm        | $cm^3\ g^{-1}$ | $g\ cm^{-3}$ | $cm^3\ g^{-1}$ |
| HC-PP     | 0.382     | 1.15  | 2.28      | 8.43           | 2.11           | 11.47     | 0.0063         | 2.0610       | 0.0427         |
| HC-PP-20  | 0.379     | 1.06  | 2.32      | 8.29           | 2.45           | 9.79      | 0.0060         | 1.6821       | 0.1520         |
| HC-PP-300 | 0.372     | 1.01  | 2.49      | 7.72           | 5.18           | 4.48      | 0.0058         | 1.5643       | 0.1968         |

**Table S4.** Electrochemical performance of HC-PP, HC-PP-20, HC-PP-300.

| Samples   | $ICE$ | Specific capacity | Plateau capacity | Plateau capacity ratio | $D_{Na^+}$       |
|-----------|-------|-------------------|------------------|------------------------|------------------|
| Units     | %     | $mAh\ g^{-1}$     | $mAh\ g^{-1}$    | %                      | $cm^2\ s^{-1}$   |
| HC-PP     | 84.37 | 293.64            | 231.19           | 66.43                  | $1.01 * 10^{-7}$ |
| HC-PP-20  | 85.96 | 313.48            | 251.88           | 69.03                  | $9.21 * 10^{-8}$ |
| HC-PP-300 | 85.58 | 327.06            | 268.98           | 70.38                  | $8.83 * 10^{-8}$ |

**Table S5.** Electrochemical performance of HC-WS, HC-WS-20, HC-WS-300.

| Samples   | $ICE$ | Specific capacity | Plateau capacity | Plateau capacity ratio |
|-----------|-------|-------------------|------------------|------------------------|
| Units     | %     | $mAh\ g^{-1}$     | $mAh\ g^{-1}$    | %                      |
| HC-WS     | 78.04 | 281.58            | 246.06           | 67.02                  |
| HC-WS-20  | 78.98 | 302.68            | 257.88           | 67.87                  |
| HC-WS-300 | 80.31 | 317.64            | 273.61           | 68.64                  |

**Table S6.** Electrochemical performance of HC-CS, HC-CS-20, HC-CS-300.

| Samples | $ICE$ | Specific capacity | Plateau capacity | Plateau capacity ratio |
|---------|-------|-------------------|------------------|------------------------|
| Units   | %     | $mAh\ g^{-1}$     | $mAh\ g^{-1}$    | %                      |
| HC-CS   | 81.39 | 294.04            | 248.45           | 68.77                  |

---

|           |       |        |        |       |
|-----------|-------|--------|--------|-------|
| HC-CS-20  | 81.38 | 305.16 | 261.01 | 69.60 |
| HC-CS-300 | 80.67 | 313.65 | 272.65 | 70.12 |

---

## References for this supporting information

1. L. Ma *et al.*, Effect of alkali and alkali earth metals on reactions of stable free radicals during biomass pyrolysis: an in-situ EPR study. *Fuel Processing Technology* **250**, (2023).
2. D. Bi, M. Yin, F. Huang, J. Zhang, W. Yi, Evolution and prediction model of environmentally-persistent free radicals in biomass three-component pyrolytic carbon with pyrolysis temperature. *Industrial Crops and Products* **206**, 117643 (2023).
3. Q. Peng *et al.*, Tailoring lignin-derived porous carbon toward high-energy lithium-ion capacitor through varying Sp<sup>2</sup>- and Sp<sup>3</sup>-hybridized bonding. *Advanced Functional Materials* **33**, 2308284 (2023).
4. X. Lei *et al.*, Regulation of composition, microstructure, and pore structure of biomass-based hard carbon to boost the sodium storage performance. *Journal of Energy Storage* **101**, (2024).
5. Z. Tang *et al.*, Revealing the closed pore formation of waste wood-derived hard carbon for advanced sodium-ion battery. *NATURE COMMUNICATIONS* **14**, 6024 (2023).
6. S. Zhou *et al.*, Regulating closed pore structure enables significantly improved sodium storage for hard carbon pyrolyzing at relatively low temperature. *SUSMAT* **2**, 357-367 (2022).
7. C. Nita, B. Zhang, J. Dentzer, C. Matei Ghimbeu, Hard carbon derived from coconut shells, walnut shells, and corn silk biomass waste exhibiting high capacity for Na-ion batteries. *Journal of Energy Chemistry* **58**, 207-218 (2021).
